# Supplementary material for: Utility of a Sequence-Independent, Single-Primer-Amplification (SISPA) and Nanopore Sequencing Approach for Detection and Characterization of Tick-Borne Viral Pathogens
Source: MDPI journal article supplement (doi:10.3390/v13020203), 2021-01-29
Supplement: s1 [file s1]

Segment 1

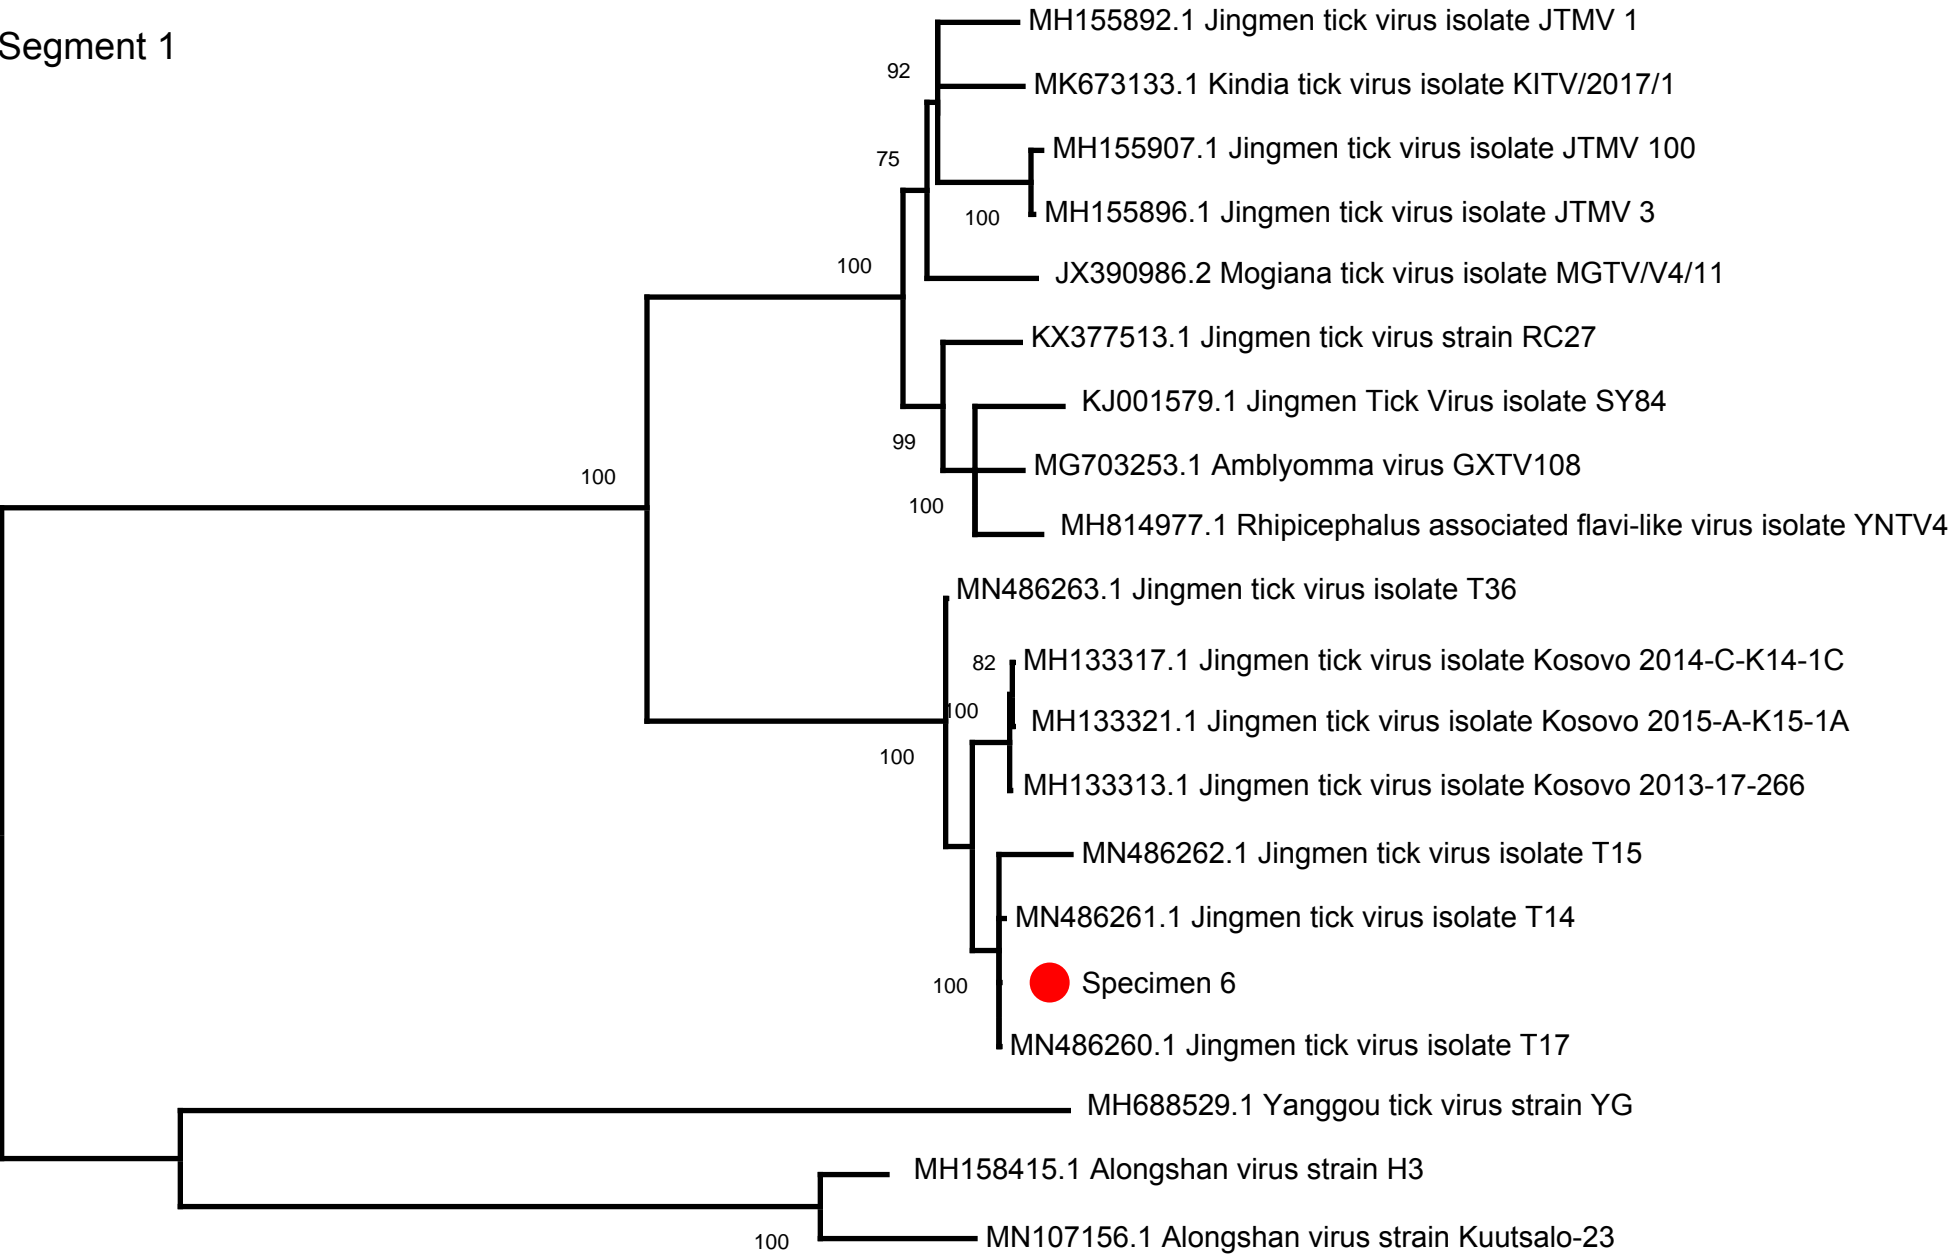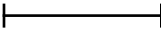

0.10

**FIGURE S:** The maximum likelihood analysis of the JMTV sequences in individual genomic segments. The trees are constructed using the general time reversible (GTR) model, gamma distributed with invariant sites (G+I) for 500 replications. The sequences generated in this study are indicated with a symbol and specimen code. Viruses included in the analyses are indicated by GenBank accession number and strain/isolate name. Bootstrap values higher than 50 are shown in the trees.

Segment 2

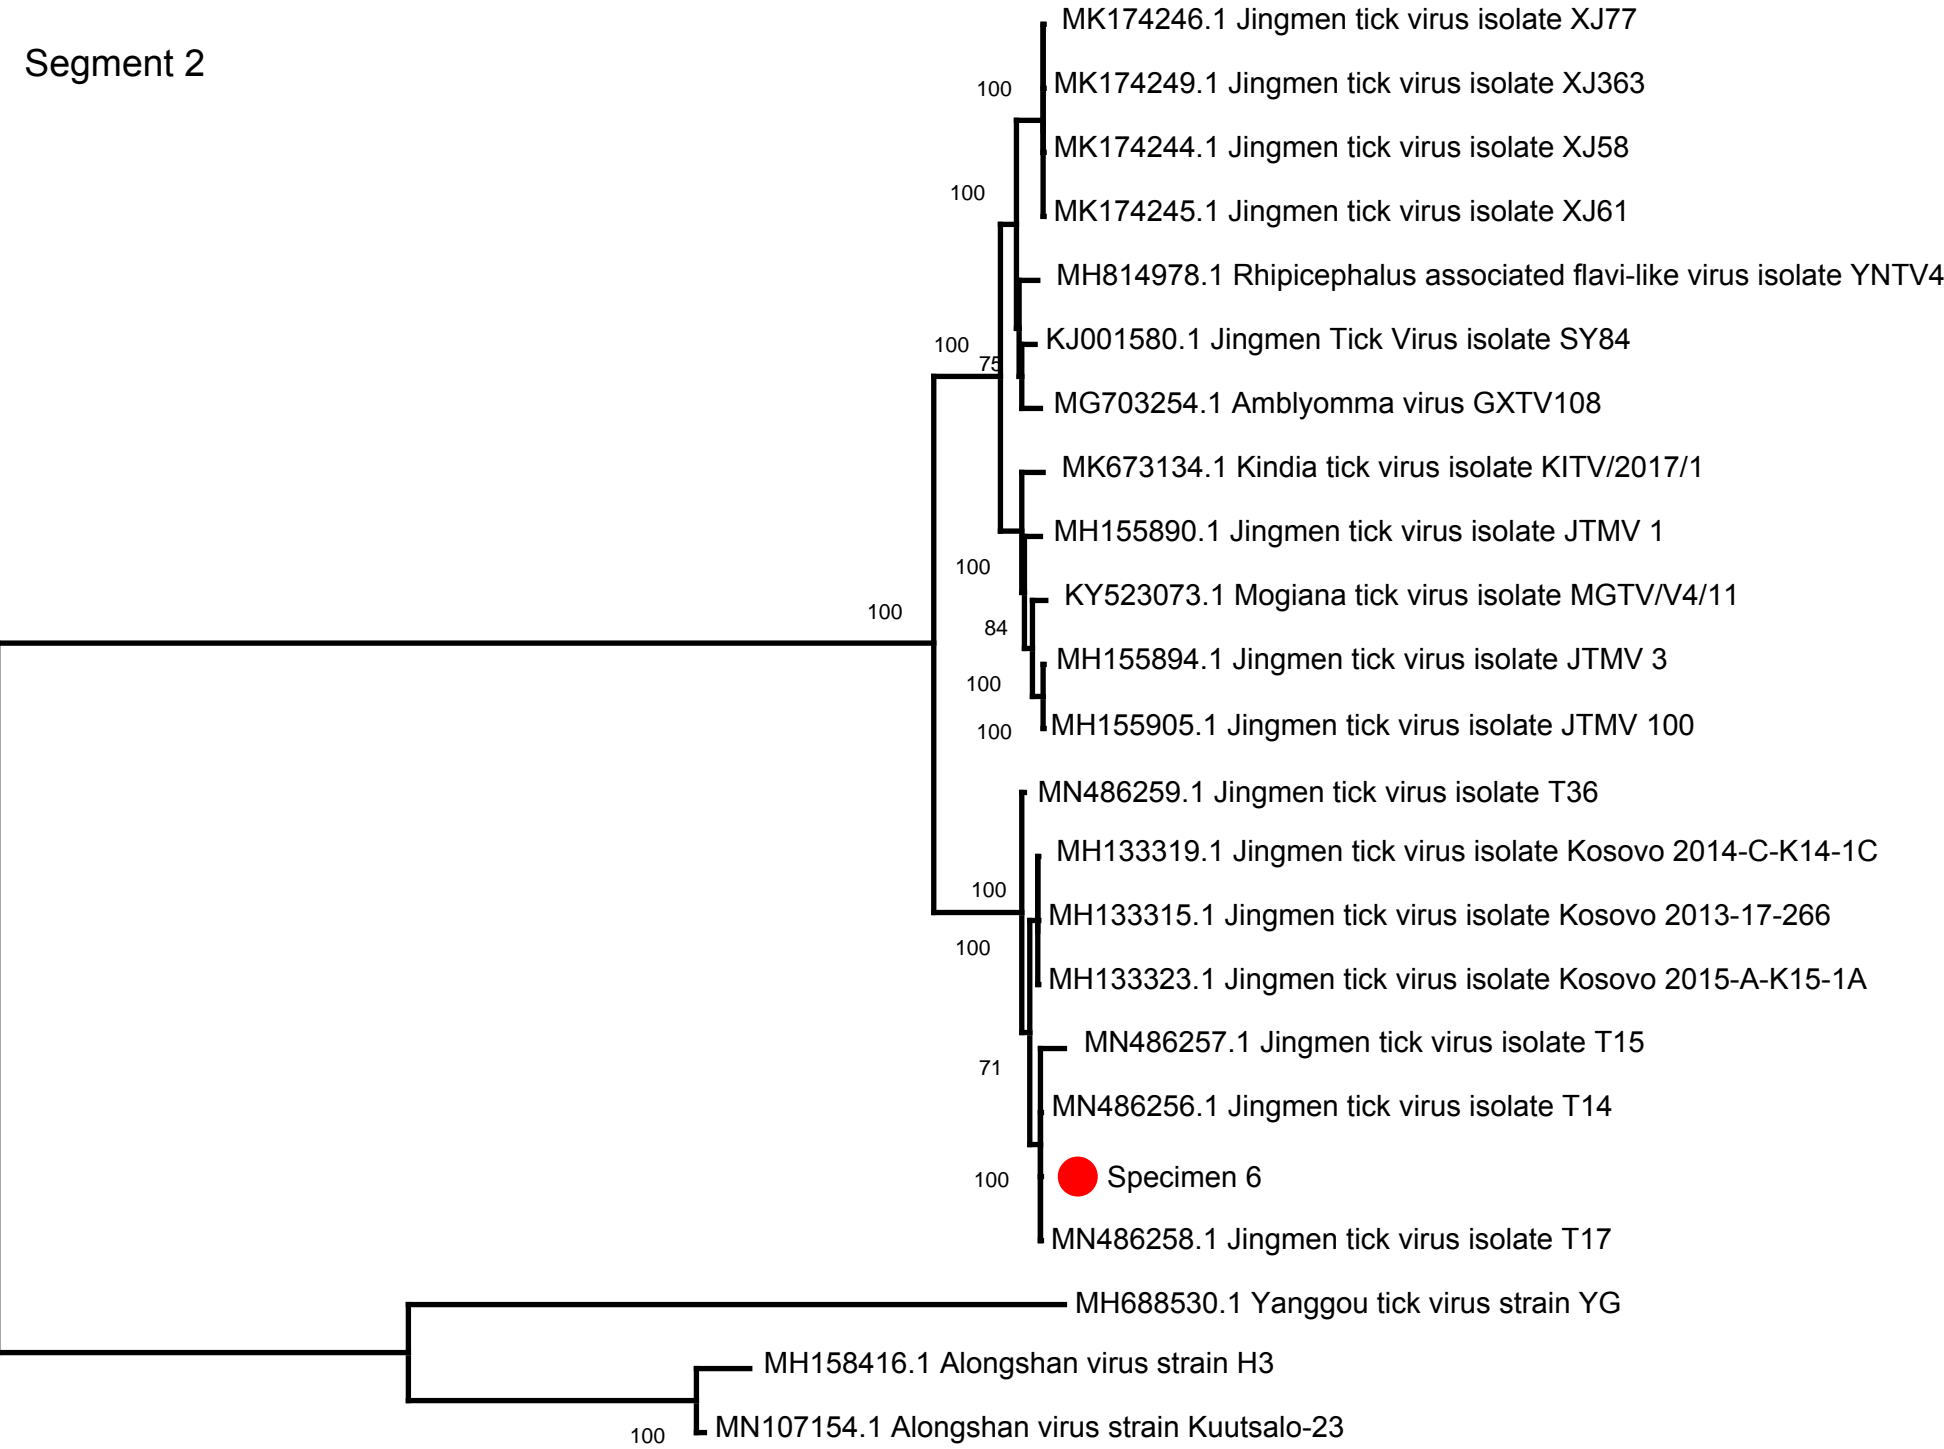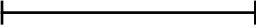

0.50

Segment 3

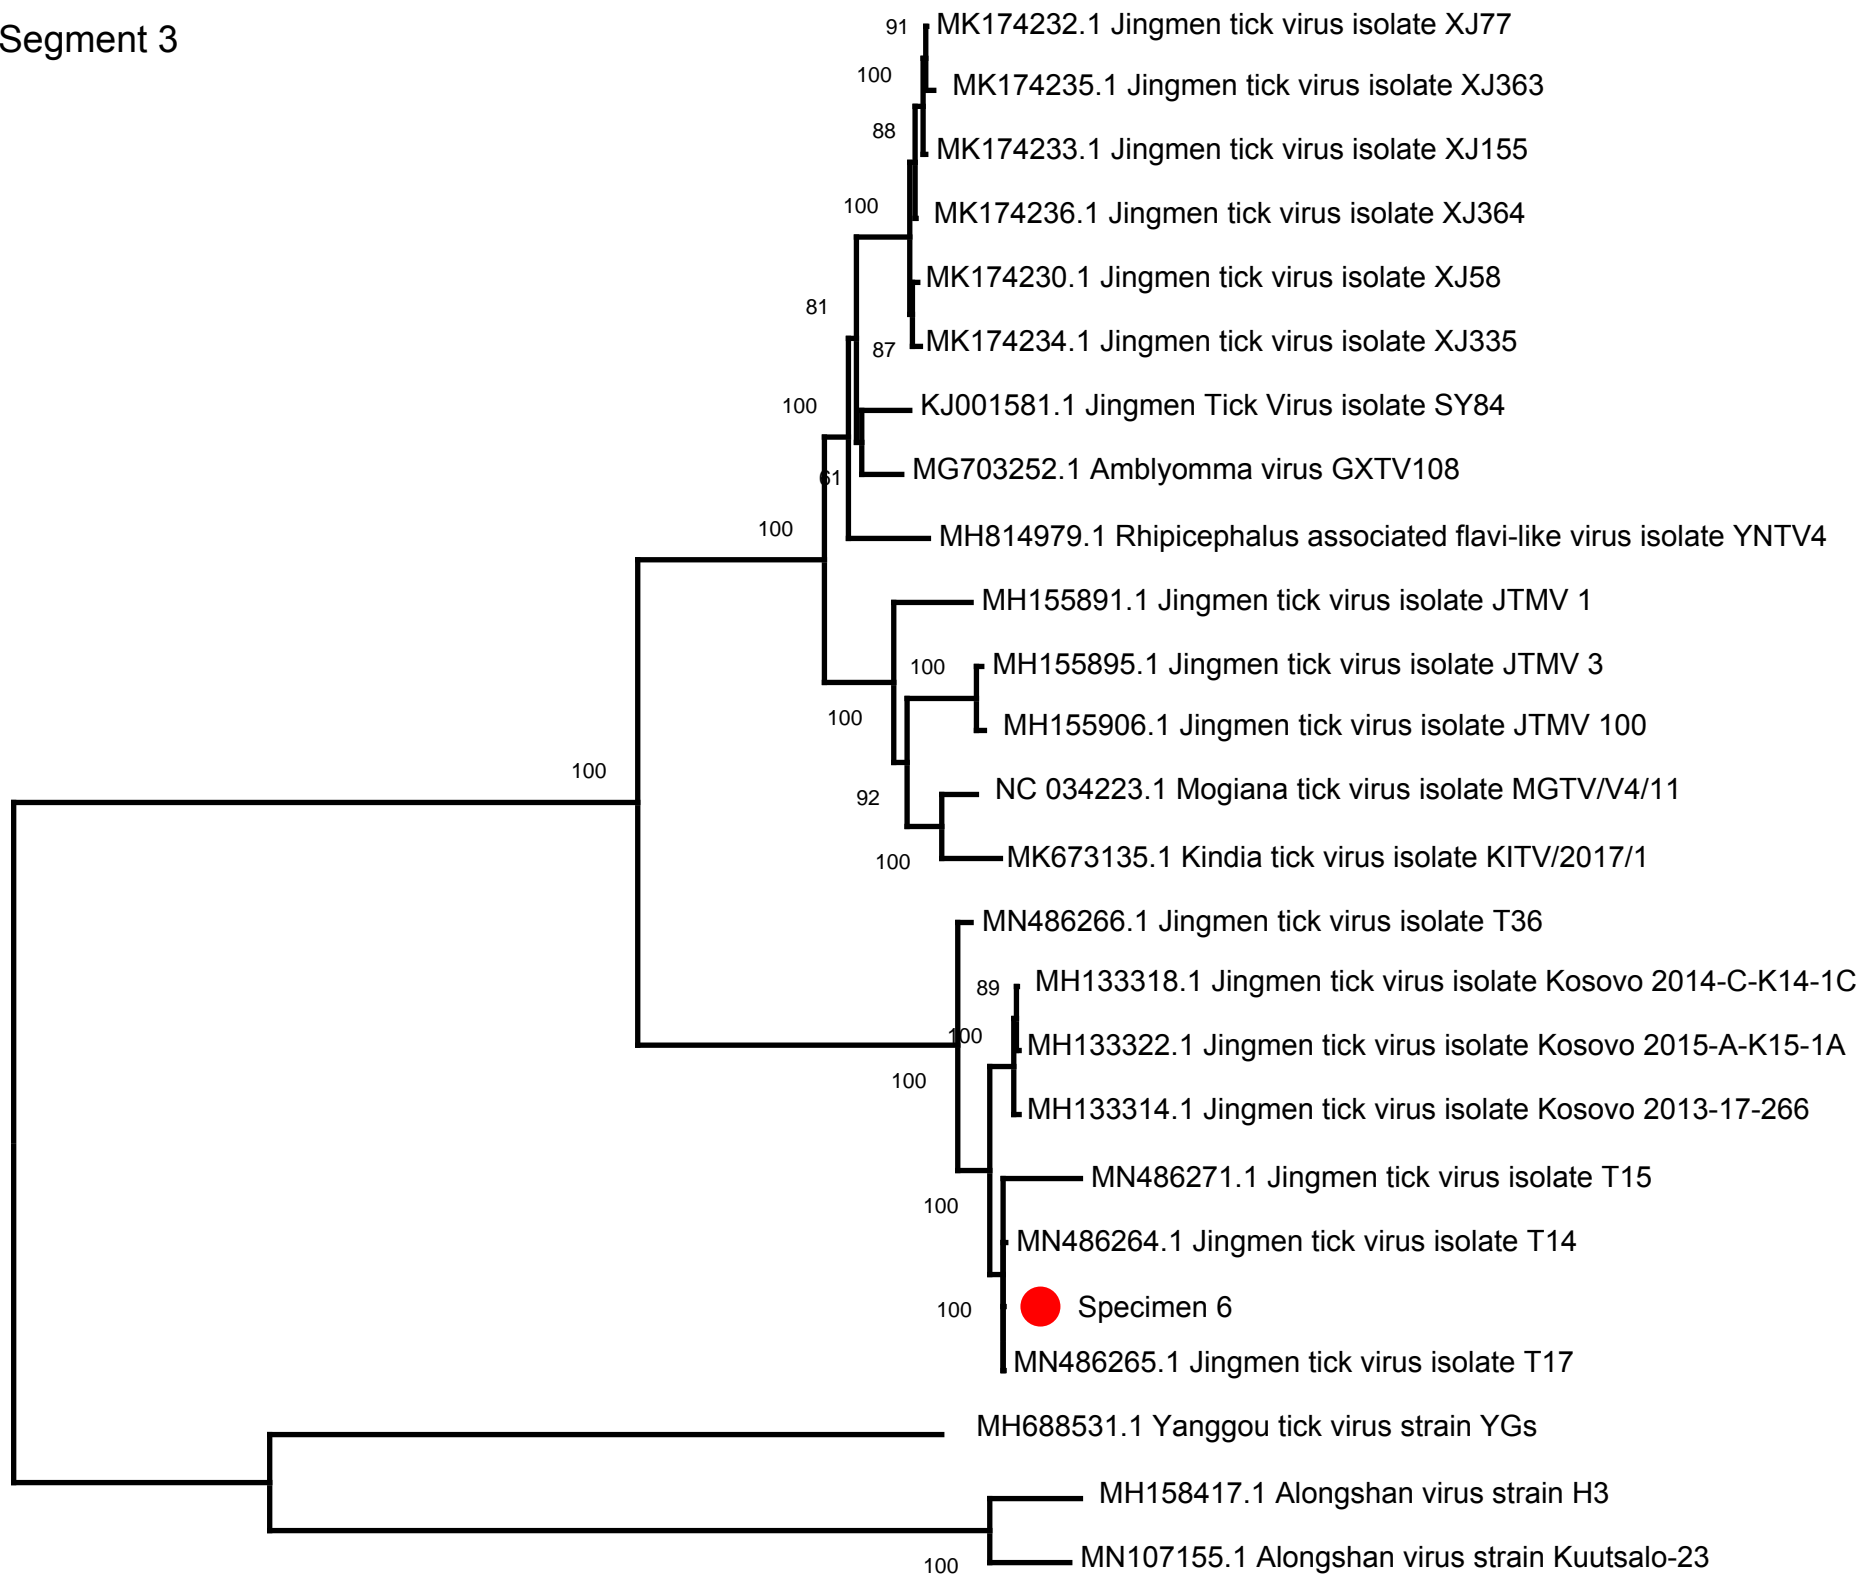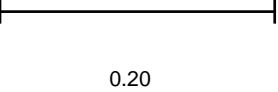

Segment 4

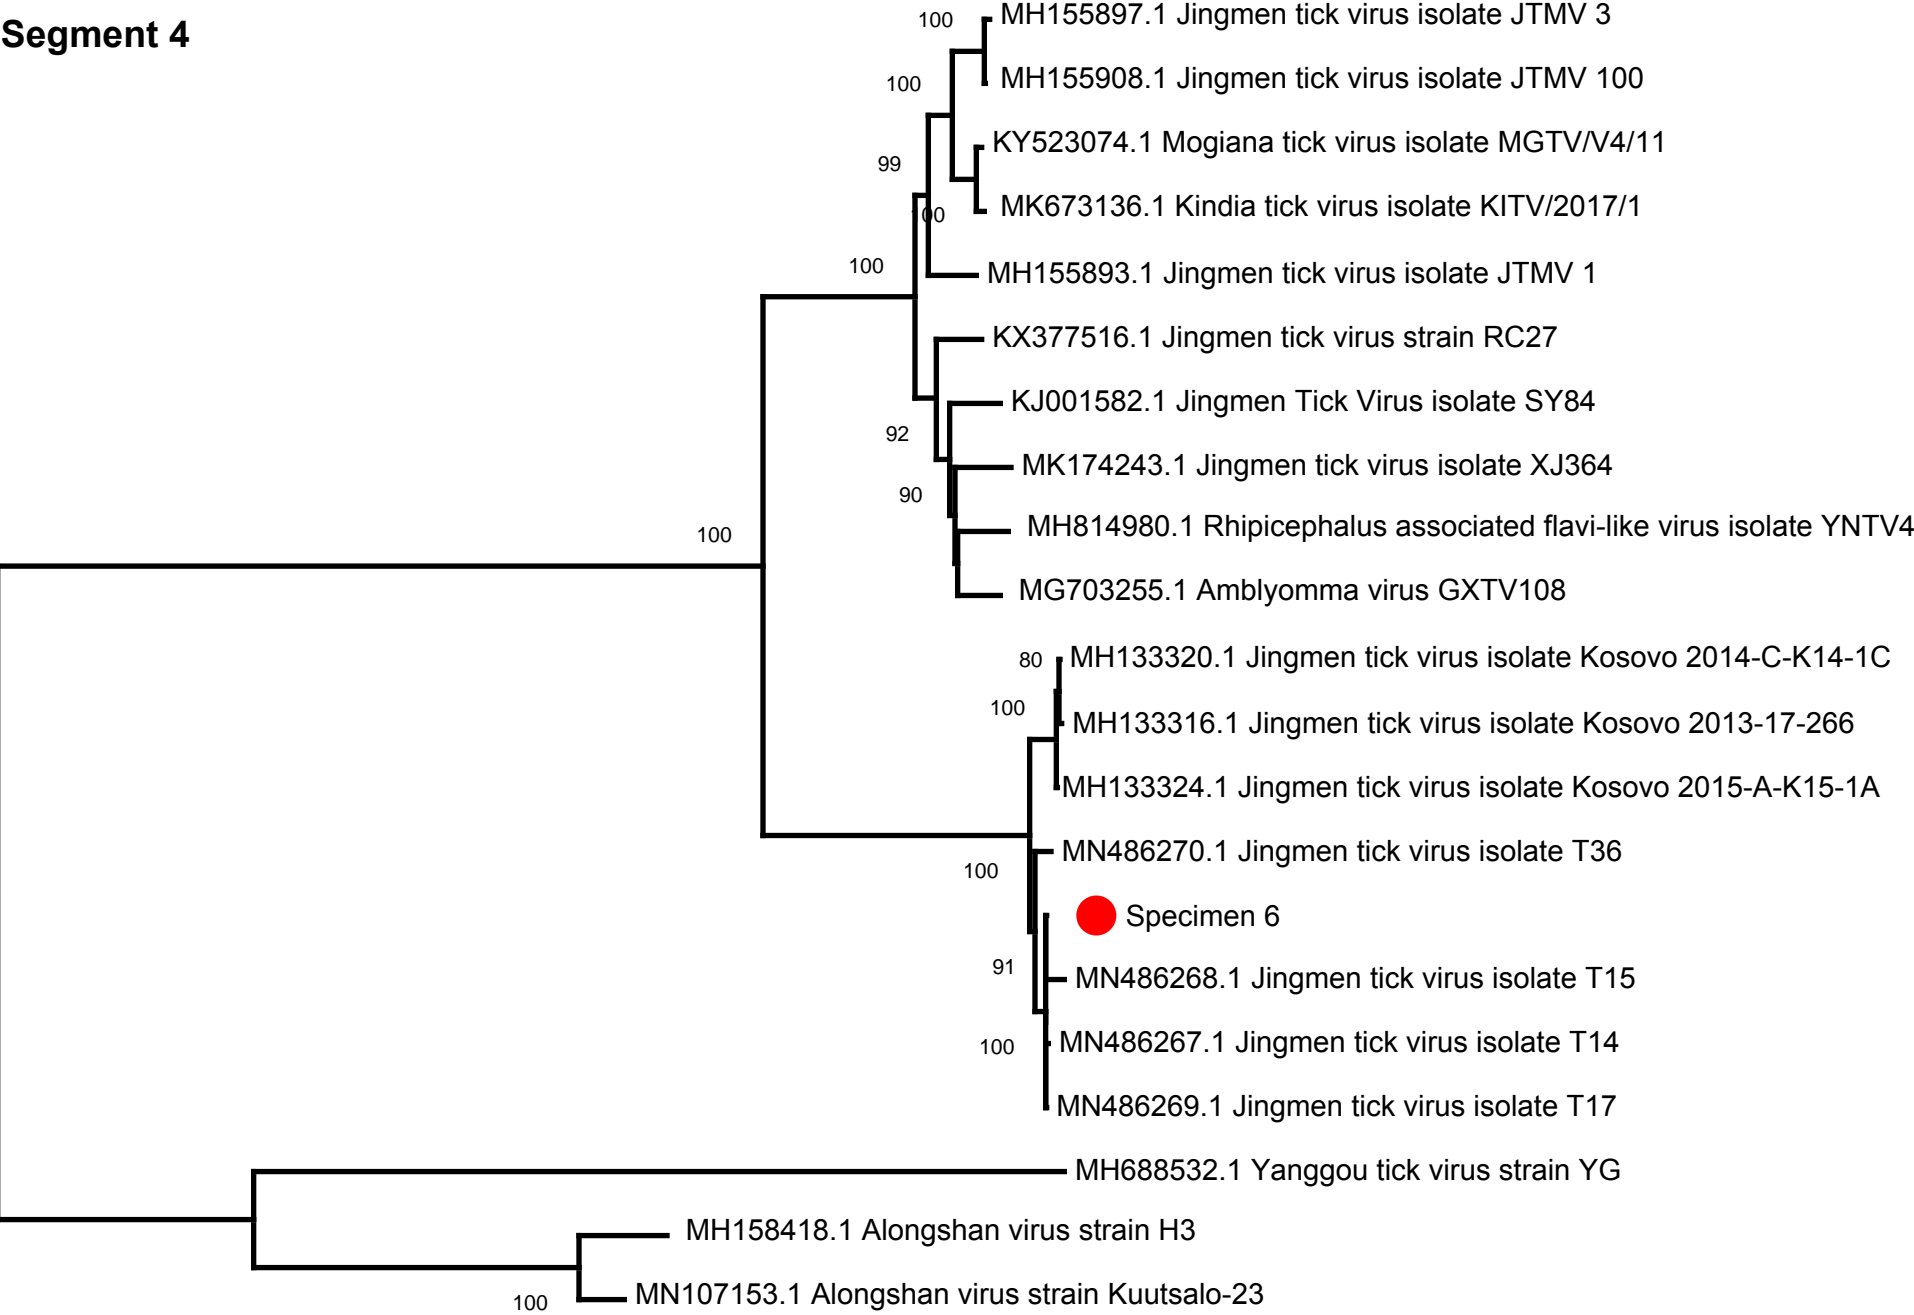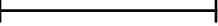

0.20
